# Supplementary material
Source: HighWire-hosted journal article supplement (https://erj.ersjournals.com/content/54/5/1900804)
Supplement: inline-supplementary-material-1 [file inline-supplementary-material-1.pdf]

**Supplementary TABLE E1** The proportion of patients who met the definition of CS-dependent asthma or CS-independent asthma during the follow-up period

| Year | CS-dependent asthma | CS-independent asthma |
|------|---------------------|-----------------------|
| 1    | 57.9                | 98.8                  |
| 2    | 46.6                | 97.9                  |
| 3    | 39.4                | 97.8                  |
| 4    | 34.2                | 97.8                  |
| 5    | 31.3                | 97.7                  |
| 6    | 29.1                | 97.7                  |
| 7    | 26.8                | 97.7                  |
| 8    | 24.8                | 97.6                  |
| 9    | 23.2                | 97.6                  |

Data are presented as percentages. The proportion of patients who met the definition of each group was calculated, except for those who died in the previous year.
