# Supplementary material
Source: HighWire-hosted journal article supplement (https://erj.ersjournals.com/content/54/5/1900804)
Supplement: inline-supplementary-material-2 [file inline-supplementary-material-2.pdf]

**Supplementary TABLE E2** Occurrence of New Comorbidities in CS-dependent and CS-independent cohort

|                                   | Total<br>(N=16,668) | CS-dependent<br>asthma<br>(n=8,334) | CS-independent<br>asthma<br>(n=8,334) | p-value |
|-----------------------------------|---------------------|-------------------------------------|---------------------------------------|---------|
| Metabolic diseases                | 6,258               | 6,784                               | 5,800                                 | < 0.001 |
| Diabetes mellitus                 | 5,745               | 5,950                               | 5,563                                 | 0.007   |
| Cushing disease                   | 273                 | 437                                 | 129                                   | < 0.001 |
| Adrenal insufficiency             | 402                 | 657                                 | 181                                   | < 0.001 |
| Bone disease                      | 6,145               | 6,518                               | 5,818                                 | < 0.001 |
| Bone necrosis                     | 141                 | 175                                 | 110                                   | 0.001   |
| Osteoporosis                      | 4,907               | 5,025                               | 4,802                                 | 0.093   |
| Vertebral or pelvic bone fracture | 1,983               | 2,307                               | 1,702                                 | < 0.001 |
| Infectious disease                | 6,998               | 8,067                               | 6,105                                 | < 0.001 |
| Pneumonia                         | 5,916               | 6,726                               | 5,234                                 | < 0.001 |
| Tuberculosis                      | 1,788               | 2,124                               | 1,496                                 | < 0.001 |
| Cardiovascular disease            | 9,328               | 9,883                               | 8,838                                 | < 0.001 |
| Hypertension                      | 3,592               | 3,760                               | 3,443                                 | 0.004   |
| Angina                            | 3,579               | 3,608                               | 3,553                                 | 0.616   |
| Myocardial infarction             | 1,274               | 1,475                               | 1,097                                 | < 0.001 |
| Congestive heart failure          | 2,514               | 2,789                               | 2,272                                 | < 0.001 |
| Gastrointestinal disease          | 7,061               | 7,232                               | 6,908                                 | 0.052   |
| Peptic ulcer disease              | 6,233               | 6,303                               | 6,169                                 | 0.385   |
| Gastrointestinal bleeding         | 934                 | 1,058                               | 824                                   | < 0.001 |

|                        |     |     |     |         |
|------------------------|-----|-----|-----|---------|
| Ophthalmologic disease | 330 | 391 | 276 | < 0.001 |
| Glaucoma               | 42  | 46  | 38  | 0.466   |
| Cataract               | 294 | 354 | 241 | < 0.001 |

---

Data are presented as frequency (cases/100,000 person-years).

CS: corticosteroid.
